# Supplementary material for: Implanting FeCo/C nanocages with tunable electromagnetic parameters in anisotropic wood carbon aerogels for efficient microwave absorption
Source: Royal Society of Chemistry journal article supplement (doi:10.1039/d0ta05540a), 2020-01-01
Supplement: d0ta05540a1.pdf [file d0ta05540a1.pdf]

## Implanting FeCo/C Nanocages with Tunable Electromagnetic Parameters in Anisotropic Wood Carbon Aerogels for Efficient Microwave Absorption

Ye Xiong, Lulu Xu, Caixia Yang, Qingfeng Sun,\* and Xijin Xu\*

School of Engineering, Zhejiang A & F University, Hangzhou, Zhejiang Province,  
311300, PR China

\*Corresponding author: qfsun@zafu.edu.cn and xijinxu@yahoo.cn.

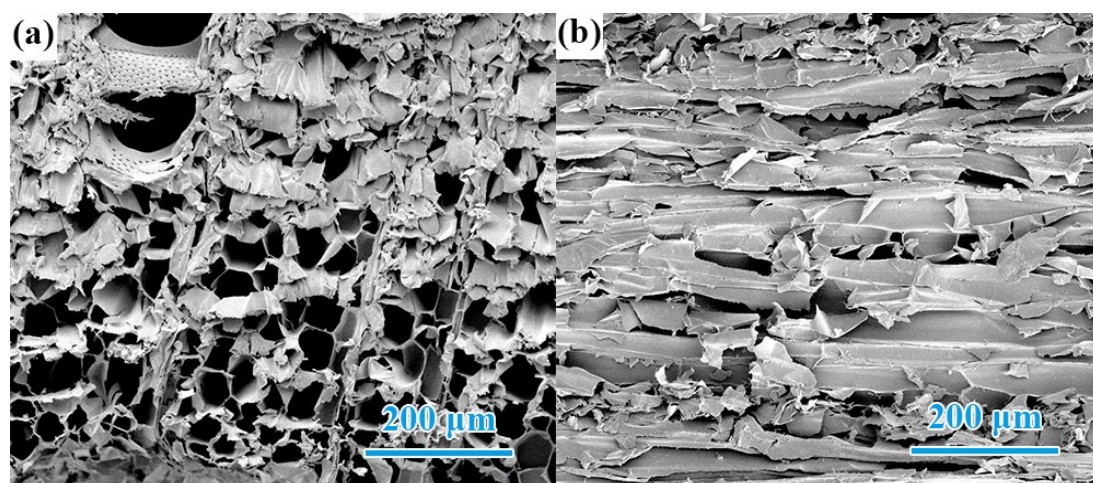

**Figure S1.** SEM images of the natural wood: (a) the cross-sections and (b) the longitudinal sections.

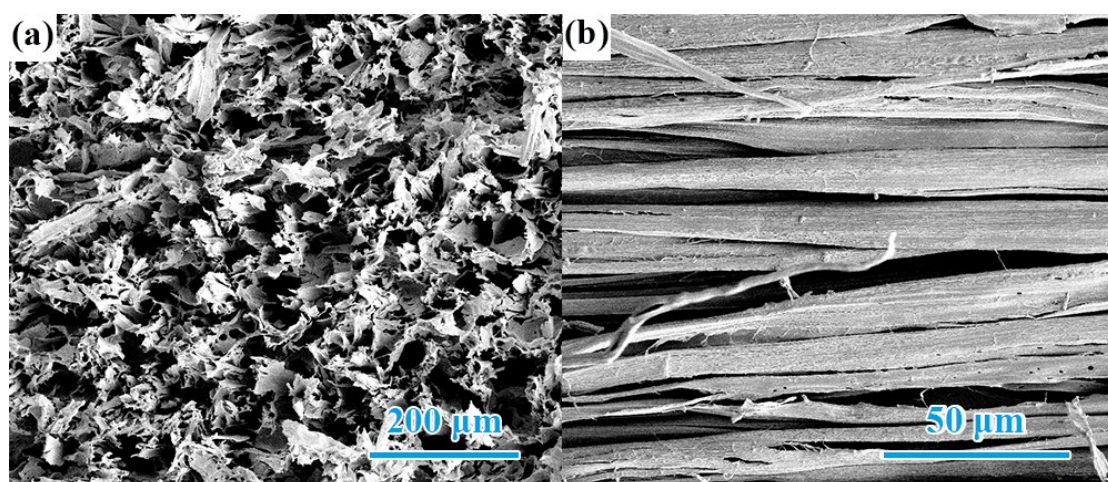

**Figure S2.** SEM images of the delignified wood aerogel: (a) the cross-sections and (b) the longitudinal sections.

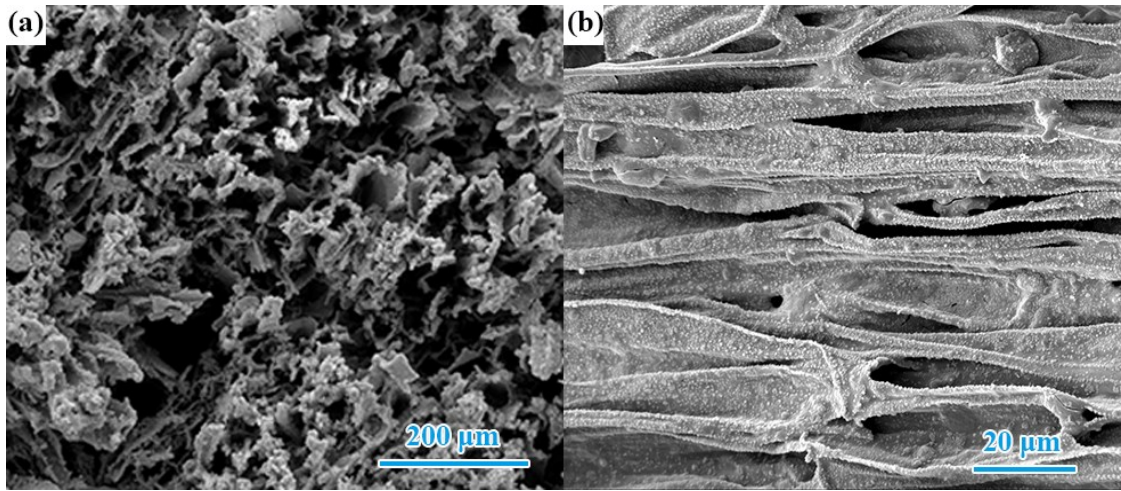

**Figure S3.** SEM images of the  $\text{Fe}_3\text{O}_4/\text{ZIF-67@WA}$ : (a) the cross-sections and (b) the longitudinal sections.

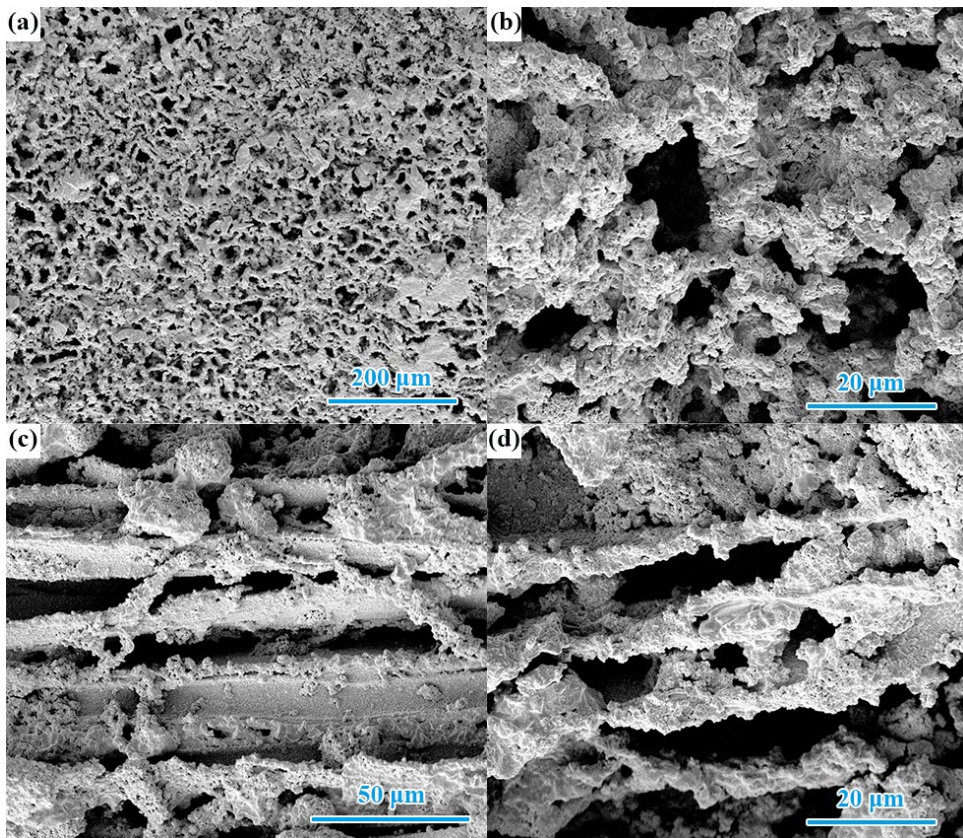

**Figure S4.** SEM images of the  $\text{FeCo/C@WC}$ : (a-b) the cross-sections and (c-d) the longitudinal sections.

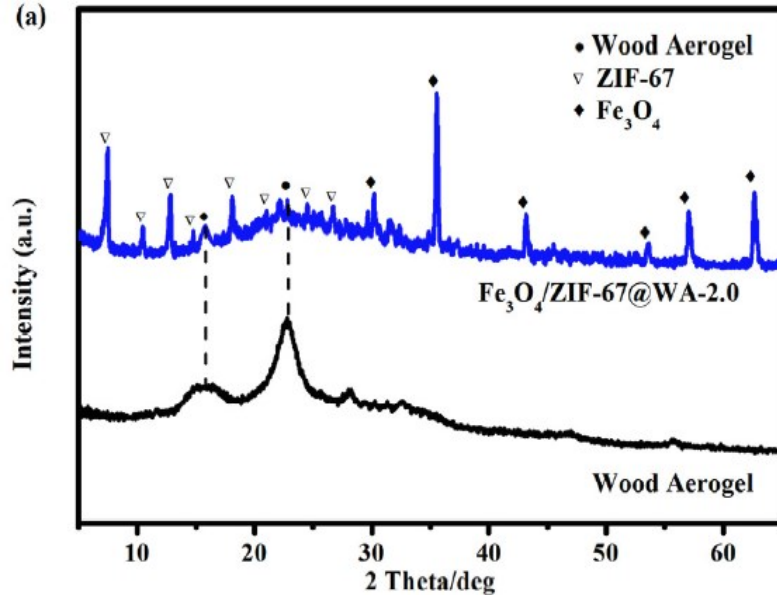

**Figure S5.** XRD curves of WA and  $\text{Fe}_3\text{O}_4/\text{ZIF-67}@WA$ .

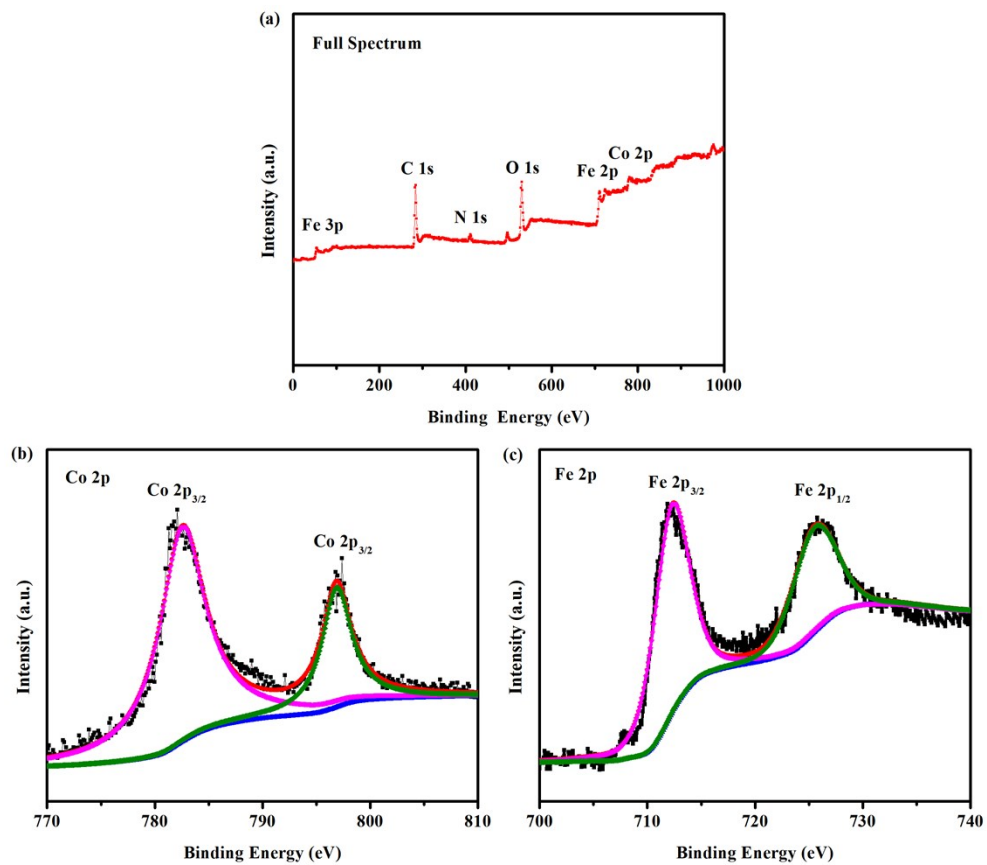

**Figure S6.** XPS curves of  $\text{FeCo/C}@WC$ : (a) full spectrum, (b) Co 2p, and (d) Fe 2p.

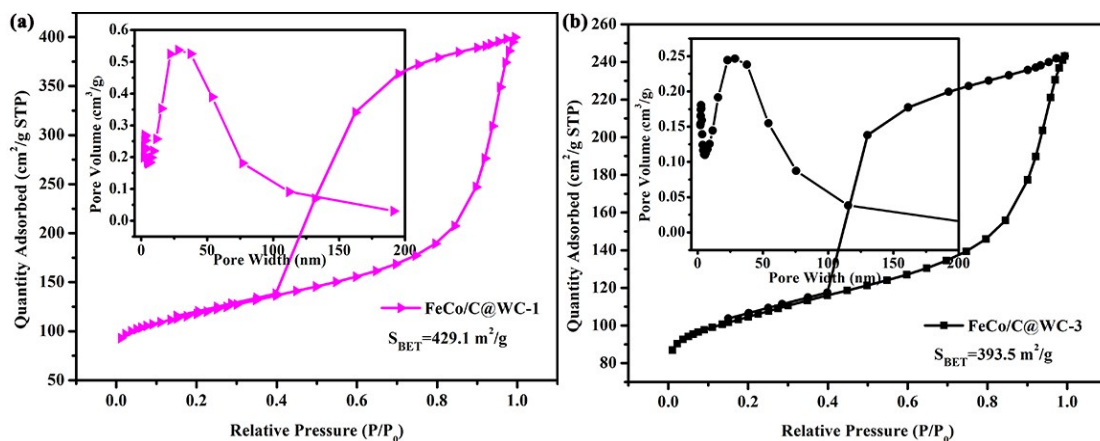

**Figure S7.** Nitrogen adsorption-desorption curves of (a) FeCo/C@WC-1 and (b) FeCo/C@WC-3.

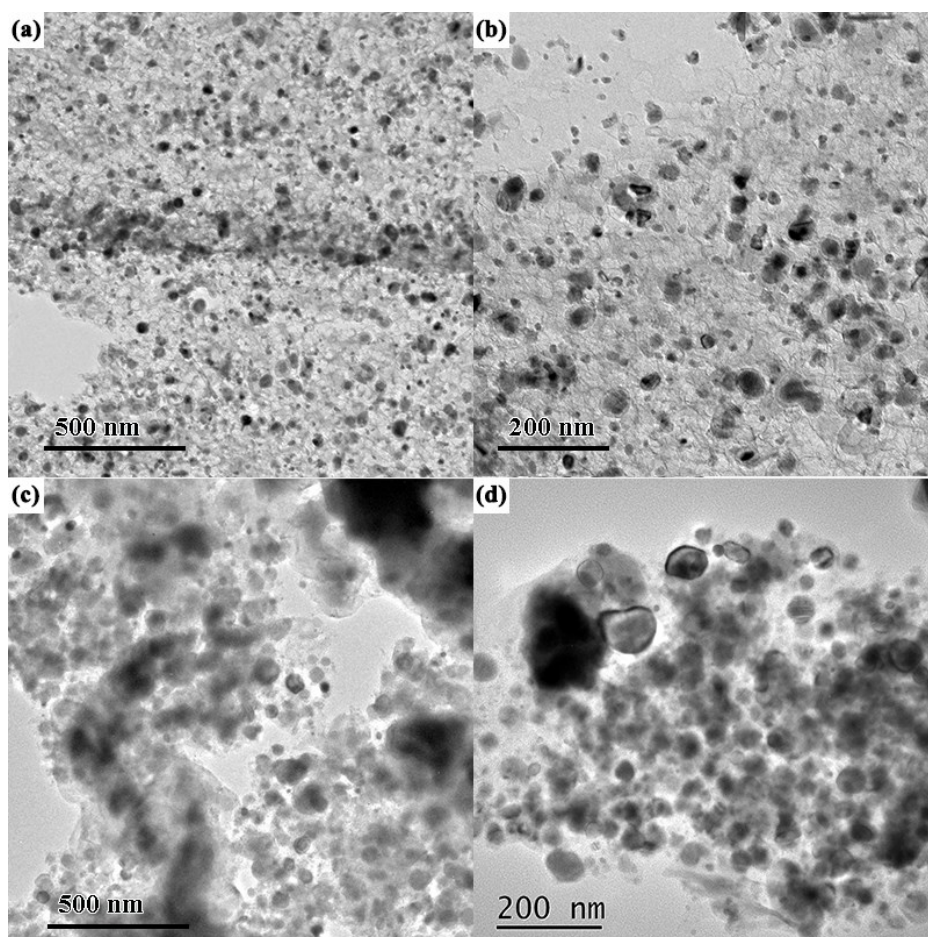

**Figure S8.** TEM images of (a-b) FeCo/C@WC-1 and (c-d) FeCo/C@WC-3.

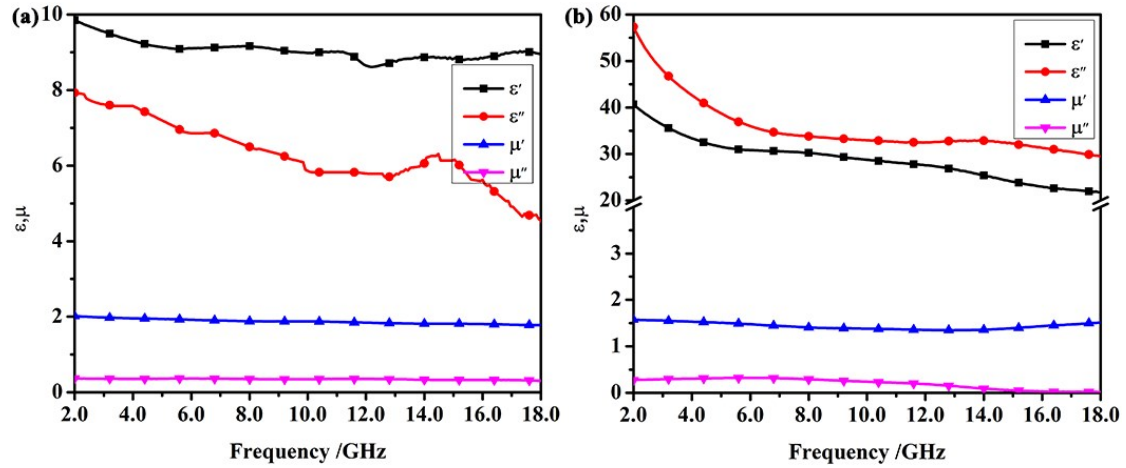

**Figure S9.** Frequency dependence of composites permittivity and permeability: (a) Fe/C@WC and (b) Co/C@WC.

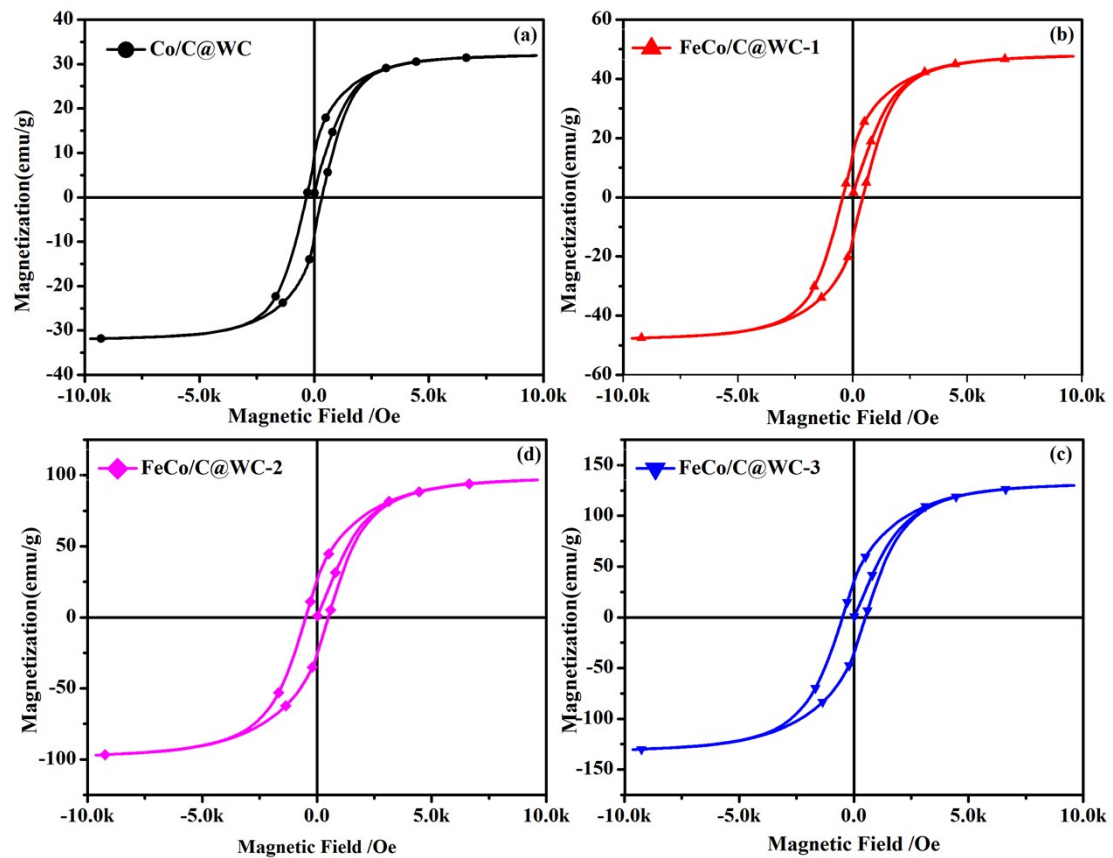

**Figure S10.** Field-dependent magnetization curve of Co/C@WC, FeCo/C@WC-1, FeCo/C@WC-2, and FeCo/C@WC-3 at room temperature.

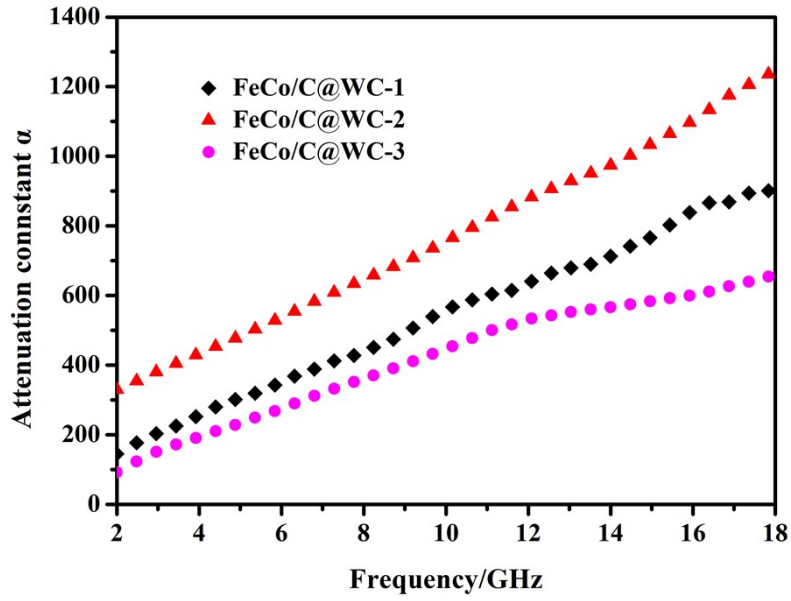

Figure S11. The attenuation constants for FeCo/C@WC.

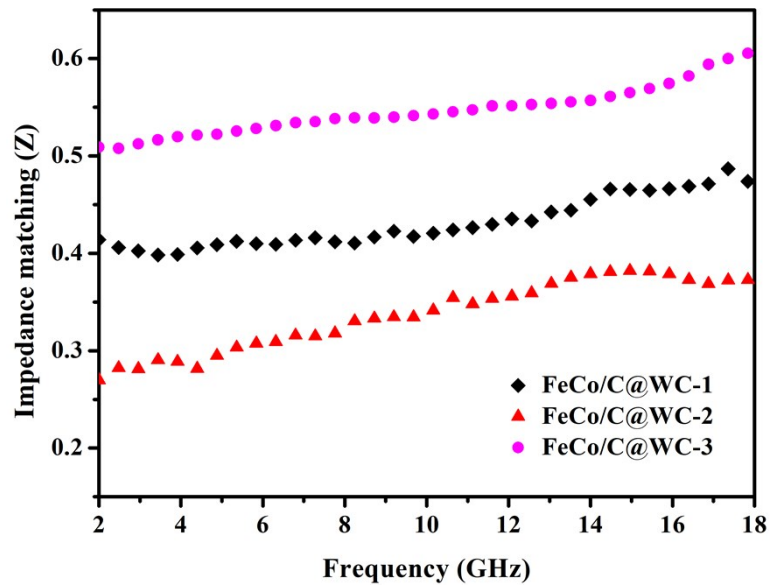

Figure S12. Frequency dependence of the impedance matching ratio ( $Z_r$ ).

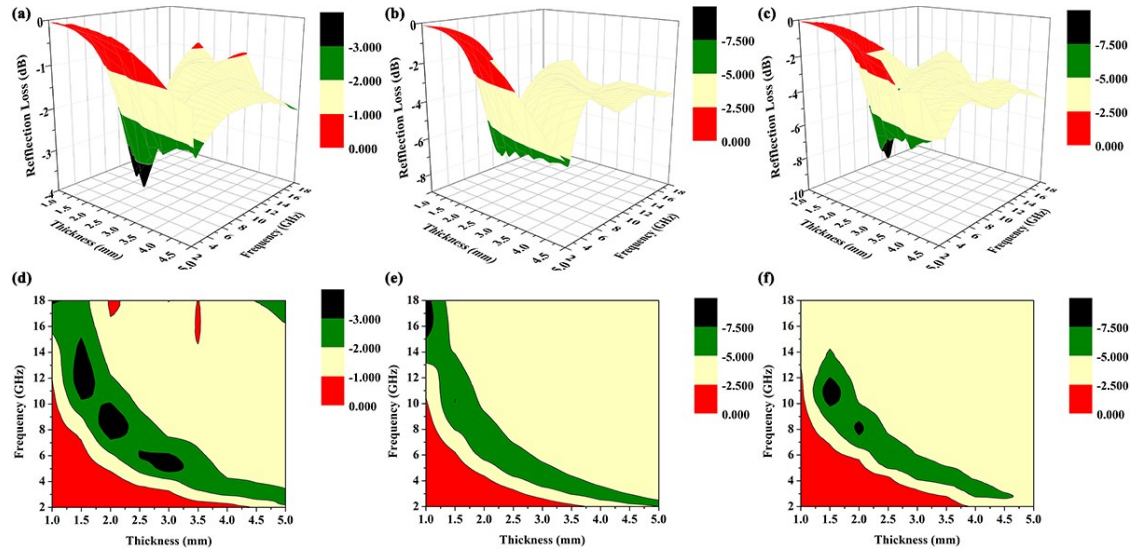

**Figure S13.** (a-c) 3D representations of reflection loss and (d-f) the efficient absorption bandwidths of WC, Fe/C@WC, and Co/C@WC.

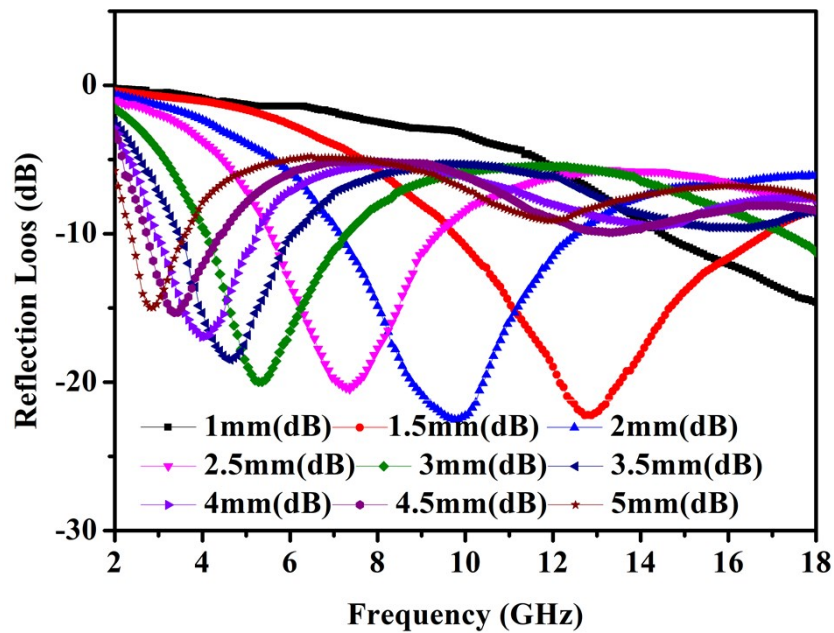

**Figure S14.** Frequency dependence of reflection losses of FeCo/C@WC-1.

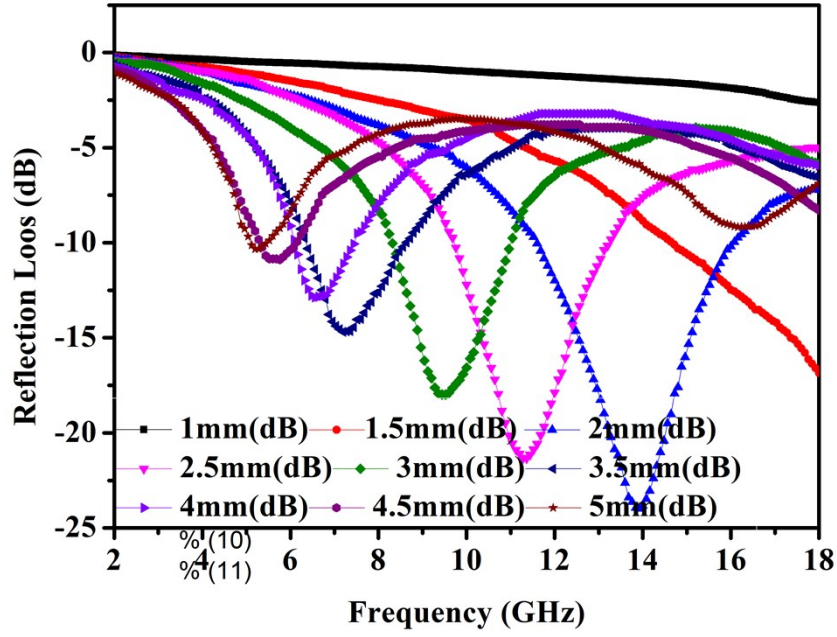

**Figure S15.** Frequency dependence of reflection losses of FeCo/C@WC-3.

**Table S1.** The density of the samples.

| Sample      | Density (mg/cm <sup>3</sup> ) |
|-------------|-------------------------------|
| WC          | 70.78                         |
| FeCo/C@WC-1 | 42.52                         |
| FeCo/C@WC-2 | 48.13                         |
| FeCo/C@WC-3 | 52.24                         |



**Table S2.** The content of FeCo were obtained by Energy Dispersive Spectrometer (EDS).

| Atomic percentage | Co   | Fe    | C     | O    | N    |
|-------------------|------|-------|-------|------|------|
| FeCo/C@WC-1       | 7.09 | 3.24  | 76.47 | 9.85 | 3.35 |
| FeCo/C@WC-2       | 6.45 | 7.18  | 74.42 | 9.32 | 3.63 |
| FeCo/C@WC-3       | 5.86 | 12.92 | 71.93 | 8.63 | 4.26 |

**Table S3.** Typical carbon-based composites and their MA performance.

| Absorbers                                   | RLmax (dB) | Thickness (mm) | Absorption bandwidth (GHz) | SRL <sub>t</sub> | Ref.      |
|---------------------------------------------|------------|----------------|----------------------------|------------------|-----------|
| CNTs/Co                                     | -54.5      | 3.0            | 2.5                        | -18.2            | [1]       |
| FeCo/CNTs                                   | -46.5      | 1.7            | 3.92                       | -27.4            | [2]       |
| CMT@CNT/Co                                  | -52.3      | 2.0            | 5.1                        | -26.1            | [3]       |
| Fe <sub>x</sub> CyNz/N-CNT                  | -25.1      | 4.0            | 1.2                        | -6.3             | [4]       |
| Ni/SnO <sub>2</sub> /MWCNT                  | -39.2      | 1.5            | 3.6                        | -26.1            | [5]       |
| ERG/Si <sub>3</sub> N <sub>4</sub>          | -26.7      | 3.75           | 4.2                        | -7.12            | [6]       |
| RGO/hBN                                     | -23        | 1.2            | 3                          | -19.2            | [7]       |
| Fe <sub>3</sub> O <sub>4</sub> -graphene    | -30.1      | 1.48           | 10.5                       | -20.3            | [8]       |
| RGO/PANI                                    | -36.9      | 3.5            | 4.2                        | -10.5            | [9]       |
| RGO/MWCNTs/ZnFe <sub>2</sub> O <sub>4</sub> | -22.2      | 1.0            | 2.3                        | -22.2            | [10]      |
| CF@G@PPy                                    | -45.12     | 2.5            | 2.5                        | -18.0            | [11]      |
| Polypyrrole aerogel                         | -34.6      | 2.5            | 6.2                        | -13.8            | [12]      |
| Fe-C nanofibers                             | -36.0      | 3.0            | 0.9                        | -12.0            | [13]      |
| Co/N-C NFs                                  | -25.7      | 2.0            | 4.3                        | -12.9            | [14]      |
| Biomass-pyrolized carbon                    | -68.3      | 4.28           | 6.13                       | -15.9            | [15]      |
| FeCo/C@WC                                   | -47.6      | 1.5            | 6.3                        | -31.7            | This work |

## References

- [1] Y. Yin, X. Liu, X. Wei, R. Yu, J. Shui, *ACS applied materials & interfaces* **2016**, 8, 34686.
- [2] B. Yang, Y. Wu, X. Li, R. Yu, *Materials & Design* **2017**, 136, 13.
- [3] Z. Wu, K. Pei, L. Xing, X. Yu, W. You, R. Che, *Advanced Functional Materials* **2019**, 29, 1901448.
- [4] Y. Zhou, J. Miao, Y. Shen, A. Xie, *Applied Surface Science* **2018**, 453, 83.
- [5] L. Lin, H. Xing, R. Shu, L. Wang, X. Ji, D. Tan, Y. Gan, *RSC Advances* **2015**, 5, 94539.
- [6] F. Ye, Q. Song, Z. Zhang, W. Li, S. Zhang, X. Yin, Y. Zhou, H. Tao, Y. Liu, L. Cheng, *Advanced Functional Materials* **2018**, 28, 1707205.
- [7] Y. Kang, Z. Chu, D. Zhang, G. Li, Z. Jiang, H. Cheng, X. Li, *Carbon* **2013**, 61, 200.
- [8] X. Li, H. Yi, J. Zhang, J. Feng, F. Li, D. Xue, H. Zhang, Y. Peng, N. J. Mellors, *Journal of nanoparticle research* **2013**, 15, 1472.
- [9] X. Chen, F. Meng, Z. Zhou, X. Tian, L. Shan, S. Zhu, X. Xu, M. Jiang, L. Wang, D. Hui, *Nanoscale* **2014**, 6, 8140.
- [10] R. Shu, G. Zhang, J. Zhang, X. Wang, M. Wang, Y. Gan, J. Shi, J. He, *Journal of Alloys and Compounds* **2018**, 736, 1.
- [11] C. Wang, Y. Ding, Y. Yuan, X. He, S. Wu, S. Hu, M. Zou, W. Zhao, L. Yang, A. Cao, *Journal of Materials Chemistry C* **2015**, 3, 11893.
- [12] A. Xie, F. Wu, M. Sun, X. Dai, Z. Xu, Y. Qiu, Y. Wang, M. Wang, *Applied Physics Letters* **2015**, 106, 222902.
- [13] T. Wang, H. Wang, X. Chi, R. Li, J. Wang, *Carbon* **2014**, 74, 312.
- [14] H. Liu, Y. Li, M. Yuan, G. Sun, H. Li, S. Ma, Q. Liao, Y. Zhang, *ACS applied materials & interfaces* **2018**, 10, 22591.
- [15] J. Xi, E. Zhou, Y. Liu, W. Gao, J. Ying, Z. Chen, C. Gao, *Carbon* **2017**, 124, 492.
